# Supplementary material for: Associations between Inflammatory Cytokine Gene Polymorphisms and Susceptibilities to Intracranial Aneurysm in Chinese Population
Source: Biomed Res Int. 2021 Jan 16;2021:8865601. doi: 10.1155/2021/8865601 (PMC7826207; doi:10.1155/2021/8865601)
Supplement: Supplementary Materials — Table S1: PCR primers designed for SNPs. Table S2: univariate logistic regression analysis of associations between inflammatory cytokine gene polymorphisms and risk of IA in Chinese population. Table S3: univariate logistic regression analysis of associations between inflammatory cytokine gene polymorphisms and risk of single IA in Chinese population. Table S4: univariate logistic regression analysis of associations between inflammatory cytokine gene polymorphisms and risk of multiple IAs in Chinese population. [file 8865601.f1.zip]

Archive with 4 entries (4 files):
- Table S1 (2).docx
- Table S2 (2).docx
- Table S3 (1).docx
- Table S4 (1).docx
